# Supplementary material for: Construction and validation of machine learning models for sepsis prediction in patients with acute pancreatitis
Source: Springer Nature journal article supplement (doi:10.1186/s12893-023-02151-y), 2023-09-01

Supplementary Figure 1. The practical applicability of the GBDT model using SHAP

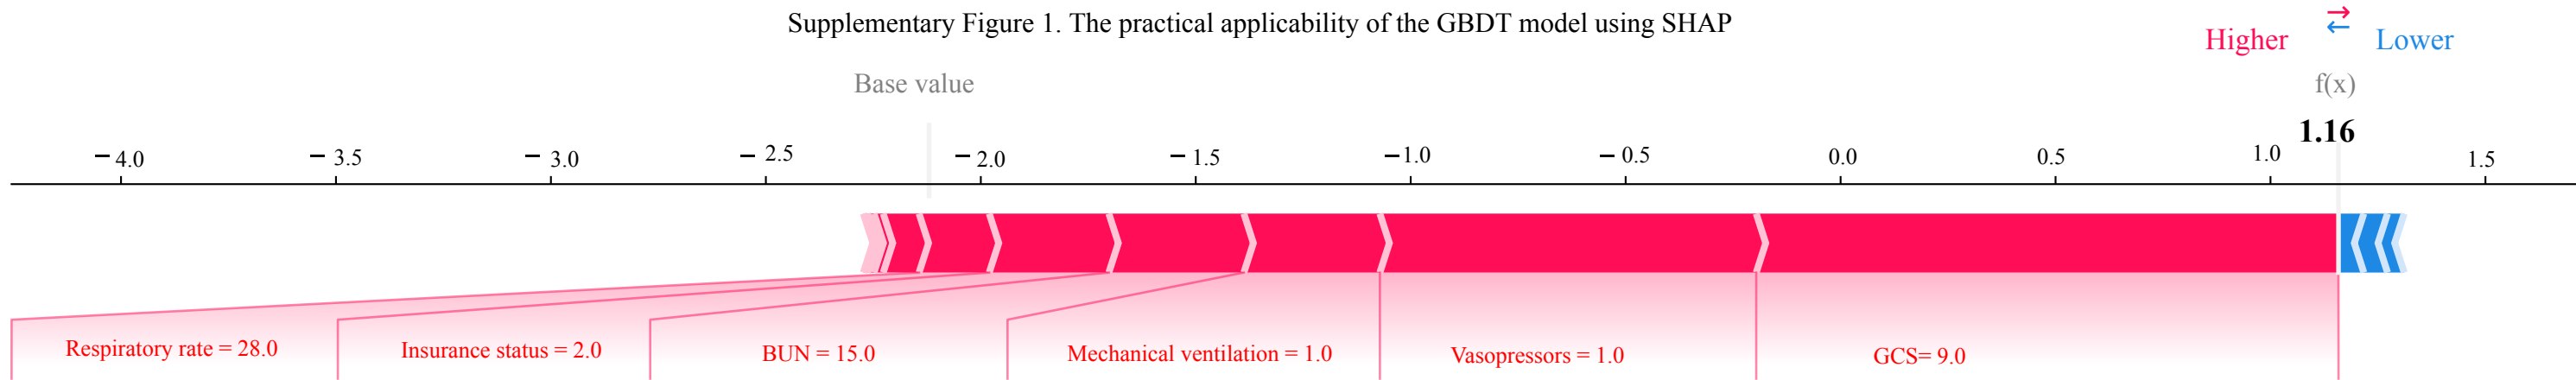

Supplement: MOESM3 [file 12893_2023_2151_MOESM3_ESM.pdf]
